# Supplementary material
Source: PubMed Central journal article supplement (PMC7310606)
Supplement: NIHMS1589828-supplement-1.pdf [file NIHMS1589828-supplement-1.pdf]

## Supplement File

## Appendix 1. Multivariable Logistic Regression Model for Complications

| <b>Adjusted OR(95% CI) and P-value for each cofounders of Complication Outcome</b> |                                 |                         |
|------------------------------------------------------------------------------------|---------------------------------|-------------------------|
|                                                                                    | <b>Adjusted OR<br/>(95% CI)</b> | <b>Adjusted P value</b> |
| Age (per unit increase)                                                            | 1.002(0.987-1.018)              | 0.7839                  |
| Oragnism(Staph. Aureus vs. Others)                                                 | 1.035(0.755-1.418)              | 0.8323                  |
| Government Payer (Yes vs No)                                                       | 1.097(0.865-1.392)              | 0.4442                  |
| Acute Infection (Active vs Treated)                                                | 1.177(0.815-1.698)              | 0.3846                  |
| WBC(per unit increase)                                                             | 1.061(1.034-1.089)              | <.0001                  |
| Hematocrit (per unit increase)                                                     | 0.936(0.914-0.959)              | <.0001                  |
| MELD Score (per unit increase)                                                     | 1.107(1.075-1.140)              | <.0001                  |
| Emergent Surgery Yes vs No                                                         | 1.961(0.910-4.222)              | 0.0854                  |
| NYHA class > II (Yes vs No)                                                        | 1.399(1.014-1.932)              | 0.0411                  |
| Tricuspid Valve Procedure                                                          |                                 |                         |
| Replacement vs Repair                                                              | 0.991(0.771-1.275)              | 0.9453                  |
| Valvectomy vs Repair                                                               | 0.860(0.504-1.467)              | 0.5799                  |

Appendix 2. Hierarchical logistic regression model with a random intercept for site and P-value for Operative Mortality

| <b>Adjusted OR(95% CL) from hierarchical model with a random intercept for site and P-value from Outcome=Operative Mortality</b> |                             |                         |
|----------------------------------------------------------------------------------------------------------------------------------|-----------------------------|-------------------------|
| <b>Effect</b>                                                                                                                    | <b>Adjusted OR (95% CL)</b> | <b>Adjusted P value</b> |
| Age (per unit increase)                                                                                                          | 1.017(0.983-1.052)          | 0.3252                  |
| Oragnism(Staph. Aureus vs. Others)                                                                                               | 0.685(0.339-1.384)          | 0.2909                  |
| Government Payer (Yes vs No)                                                                                                     | 1.113(0.606-2.045)          | 0.7302                  |
| Acute Infection (Active vs Treated)                                                                                              | 1.126(0.405-3.128)          | 0.8203                  |
| WBC(per unit increase)                                                                                                           | 1.078(1.033-1.125)          | 0.0005                  |
| Hematocrit (per unit increase)                                                                                                   | 1.003(0.941-1.069)          | 0.9353                  |
| MELD Score (per unit increase)                                                                                                   | 1.033(0.984-1.084)          | 0.1935                  |
| Emergent Surgery Yes vs No                                                                                                       | 3.105(1.399-6.889)          | 0.0054                  |
| ECMO(Yes vs No)                                                                                                                  | 16.548(4.545-60.252)        | <.0001                  |
| NYHA class > II (Yes vs No)                                                                                                      | 1.117(0.563-2.218)          | 0.7516                  |
| Tricuspid Valve Procedure                                                                                                        |                             |                         |
| Replacement vs Repair                                                                                                            | 1.057(0.493-2.266)          | 0.8876                  |
| Valvectomy vs Repair                                                                                                             | 5.528(2.317-13.191)         | 0.0001                  |
| Hospital volume ( per unit increase)                                                                                             | 0.944(0.897-0.994)          | 0.0276                  |
